# Supplementary material for: Cyclic natural product oligomers: diversity and (bio)synthesis of macrocycles
Source: Royal Society of Chemistry journal article supplement (doi:10.1039/d2cs00909a), 2024-11-25
Supplement: d2cs00909a1.xlsx [file d2cs00909a1.xlsx]

## Sheet: Sheet2
Name	NCBI-protein ID	Organism
Sky29-T-TE	AEA30274.1	Streptomyces sp. Acta 2897
Avm6840-T-TE	WP_217128250.1	Streptomyces sp. AC558_RSS880
Atr21-T-TE	QBG38782.1	Streptomyces atratus
Kcn23-T-TE	QDJ74275.1	Kitasatospora sp.
SACE_4287-T-TE	CAM03556.1	Saccharopolyspora erythraea NRRL 2338
WS19T-TE	QBA57737.1	Streptomyces sp. SNM55
Sas19T-TE	ALG65317.1	Streptomyces calvus
SAV_865-T-TE	WP_010982303.1	Streptomyces
EndC-T-TE	WP_228329555.1	Streptomyces fungicidicus
BdmD-T-TE	WP_143192258.1	Streptomyces sp. TSRI0445
Pcm30-T-TE	KPI05424.1	Actinobacteria bacterium OK006
Fri-T-TE	AGZ41988.1	Actinoplanes friuliensis
DptD-T-TE	AAX31559.1	Streptomyces filamentosus NRRL 11379
CdaPS1-T-TE	WP_011028844.1	Streptomyces coelicolor
A54145-T-TE	AAZ23078.1	Streptomyces fradiae A54145
VAB18032_24915	AEB46081.1	Micromonospora maris AB-18-032
RHA1_r002207	WP_011595005.1	Rhodococcus jostii
EntFT-TE	AAA92015.1	Escherichia coli
RzmA-T-TE	WP_013428324.1	Mycetohabitans rhizoxinica
HolA-T-TE	WP_041754829.1	Mycetohabitans rhizoxinica
PlyH-T-TE	AGZ15460.1	Streptomyces sp. MK498-98F14
Luz2T-TE	UKU09925.1	Actinomadura luzonensis
TioT-TE	CAJ34375.1	Micromonospora sp. ML1
Qui6T-TE	AET98905.1	Streptomyces griseovariabilis subsp. Bandungensis
Sare_2072-ACP-Cy-TE	WP_026302140.1	Salinispora arenicola
Strop_2654-ACP-Cy-TE	ABP55098.1	Salinispora tropica CNB-440
GlmI-T-TE	WP_053013556.1	Caldimonas brevitalea
Sce8255_T-TE	WP_012240864.1	Sorangium cellulosum
JagD-T-TE	CCJ67648.1	Janthinobacterium agaricidamnosum
SyrE-T-TE	SDN18883.1	Pseudomonas syringae
SrgC-T-TE	AAO72425.1	Pseudomonas syringae pv. Syringae
GlbC-T-TE	CAL80821.1	Schlegelella brevitalea
Vlm2T-TE	ABA59548.1	Streptomyces tsusimaensis
CesBT-TE	ABD14712.1	Bacillus cereus
McyC_T-TE	WP_002742831.1	Microcystis aeruginosa
SGR_814_T-TE	WP_012378089.1	Streptomyces
Sare_2407_T-TE	WP_019032802.1	Salinispora arenicola
LicC-T-TE	AWV39281.1	Bacillus licheniformis
SrfAC-T-TE	AHZ14355.1	Bacillus velezensis SQR9
GrsBT-TE	CAA43838.1	Brevibacillus brevis
TycC-T-TE	AAC45930.1	Brevibacillus brevis
FenE-T-TE	APC23839.1	Bacillus amyloliquefaciens
BmyC_T-TE	WP_023356939.1	Bacillus amyloliquefaciens
PksA-ACP-TE	3ILS	Aspergillus sp. L
CURS2-ACP-TE	AGC95321	Aspergillus terreus
RADS2-ACP-TE	ACM42403	Floropilus chiversii
DszC	AAY32966.1	Sorangium cellulosum
OooS-ACP_TE	AFX60341.1	Serratia plymuthica
SGR_6777-ACP_TE	WP_012382207.1	Streptomyces
ElaR-ACP_TE	AEC04364.1	Chitinophaga sancti
DifL-ACP_TE	CAG23983.1	Bacillus velezensis FZB42
BaeR-ACP_TE	AGZ56446.1	Bacillus amyloliquefaciens CC178
SimC1C-ACP-TE	AEU17898.1	Streptomyces antibioticus
TtmH	ABI94380.1	Streptomyces sp. CK4412
TugD-ACP-TE	ADH04660.1	Chondromyces crocatus
Lsd17-ACP-TE	BAG85032	Streptomyces lasaliensis
BafAV-ACP-TE	ADC79620.1	Streptomyces lohii
CongDT-TE	CRI73798.1	Streptomyces conglobatus
MeiA4-ACP-TE	ADC45535.1	Streptomyces nanchangensis
EryAIII-ACP-TE	AAU93805.1	Aeromicrobium erythreum
PikAIV-ACP-TE	BCN92181.1	Streptomyces sp. AM4900
Tetr-ACP-TE	QIZ24100.1	Streptomyces hygrospinosus
PimS4-ACP-TE	CAC20919.1	Streptomyces natalensis
FscF-ACp-TE	AAQ82566	Streptomyces sp. FR-008
NysK-ACP-TE	AAF71768	Streptomyces noursei ATCC 11455
AmphK-ACP-TE	AAK73503	Streptomyces nodosus
MonCII-TEII	ANZ52474	Streptomyces virginiae
NanE-TEII	AAP42868	Streptomyces nanchangensis
NigCII-TEII	ABC84462	Streptomyces violaceusniger
Sas26	WP_142233126.1	Streptomyces calvus
Sky21	AEA30264.1	Streptomyces sp. Acta 2897
Avm6855	WP_217130925.1	Streptomyces sp. AC558_RSS880
Atr10	QBG38771.1	Streptomyces atratus
Pcm17	KPI05411.1	Actinobacteria bacterium OK006
BarC-TEII	AAN32977.1	Lyngbya majuscula
SrfAD-TEII	AHZ14356.1	Bacillus velezensis SQR9
YbtT-TEII	AAC69590.1	Yersinia pestis
Sas5-TEII	WP_142233115.1	Streptomyces calvus
WS5-TEII	QBA57731.1	Streptomyces sp. SNM55
Phs-TEII	CAJ14052.1	Streptomyces viridochromogenes
EndC-TEII	WP_121547710.1	Streptomyces fungicidicus
PlyI-TEII	AGZ15461.1	Streptomyces sp. MK498-98F14
RthD-TEII	CBG67533.1	Streptomyces scabiei 87.22
Sas20-TEII	WP_142195675.1	Streptomyces calvus
Avm6833-TEII	WP_217135048.1	Streptomyces sp. AC558_RSS880
LgnA-TEII	AIZ66876.1	Streptomyces sp. MA37
PlyS-TEII	AGZ15471.1	Streptomyces sp. MK498-98F14
SlnDII-TEII	AEZ53965	Streptomyces albus
RedJ-TEII	CAA16185	Streptomyces coelicolor A3(2)
Blm-TEII	AAG02346.1	Streptomyces verticillus
VioH-TEII	AAP92498.1	Streptomyces vinaceus
GlmB-TEII	WP_047195081.1	Caldimonas brevitalea
Sky33-TEII	AEA30276.1	Streptomyces sp. Acta 2897
Atr4-TEII	QBG38765.1	Streptomyces atratus
Ply-TEII	AGZ15477.1	Streptomyces sp. MK498-98F14
PhpM-TEII	AAU00091.1	Streptomyces viridochromogenes
EryTII-TEII	AAU93793.1	Aeromicrobium erythreum
RifR-TEII	AAG52991.1	Amycolatopsis mediterranei S699
TtmT-TEII	ABW96552.1	Streptomyces spiroverticillatus
SlnDI-TEII	AEZ53955	Streptomyces albus
ZinH-TEII	ANZ22996	Streptomyces griseus
PikAV-TEII	BCN92182.1	Streptomyces sp. AM4900
IdmA-TEII	ACN69977	Streptomyces antibioticus
Fsc-TEII	AAQ82559	Streptomyces sp. FR-008
PimI-TEII	CAC20922	Streptomyces natalensis
AmphE-TEII	AJE39050	Streptomyces nodosus
NysE-TEII	AAF71777	Streptomyces noursei ATCC 11455
